# Supplementary material for: Peer effects on adolescent smoking: Are popular teens more influential?
Source: PLOS journal article supplement (doi:10.1371/journal.pone.0189360), 2018-07-12
Supplement: S7 (10.1371/journal.pone.0189360.s007) [file journal.pone.0189360.s007]

**S7 Table. Probability of smoking and smoking rates among popular and non-popular students – probit average marginal effects.**

|                            | Tried 1996          | 1996               | 2002                 | 2009              | by 2009              |
|----------------------------|---------------------|--------------------|----------------------|-------------------|----------------------|
| <i>Smoking propensity:</i> |                     |                    |                      |                   |                      |
| 20% most popular           | 0.178***<br>(0.056) | 0.055<br>(0.040)   | 0.170***<br>(0.037)  | 0.022<br>(0.063)  | 0.152**<br>(0.067)   |
| 80% least popular          | 0.04<br>(0.092)     | 0.107**<br>(0.052) | -0.221***<br>(0.066) | -0.045<br>(0.095) | -0.330***<br>(0.098) |

Regressions include school fixed effects. Standard errors clustered at the school level are shown in parenthesis. Peer smokers are those who smoke at least “once or twice a week” in 1995. Peer variables are at the grade level. Includes all covariates from S2 Table. \*Significance at the 10% level; \*\*Significance at the 5% level; \*\*\*Significance at the 1% level.
