# Supplementary material for: Peer effects on adolescent smoking: Are popular teens more influential?
Source: PLOS journal article supplement (doi:10.1371/journal.pone.0189360), 2018-07-12
Supplement: S8 (10.1371/journal.pone.0189360.s008) [file journal.pone.0189360.s008]

**S8 Table. Instrumental variable probit regression model 2: smoking rate among popular and non-popular.**

|                                               | Tried 1996        | 1996             | 2002              | 2009             | by 2009          |
|-----------------------------------------------|-------------------|------------------|-------------------|------------------|------------------|
| <i>Probit Coef.</i>                           |                   |                  |                   |                  |                  |
| smoking rate among 20% most pop.              | 0.879<br>(0.834)  | 0.532<br>(1.093) | 0.664<br>(0.911)  | 1.258<br>(0.881) | 0.753<br>(0.799) |
| smoking rate among 80% lest pop.              | -0.284<br>(0.904) | 0.021<br>(1.145) | -0.837<br>(0.952) | 0.051<br>(1.014) | 0.083<br>(0.923) |
| <i>Marginal effect</i>                        |                   |                  |                   |                  |                  |
| smoking rate among 20% most pop.              | 0.228             | 0.066            | 0.141             | 0.305            | 0.235            |
| smoking rate among 80% lest pop.              | -0.074            | 0.003            | -0.177            | 0.012            | 0.026            |
| p-value Wald exogeneity test                  | 0.869             | 0.667            | 0.964             | 0.236            | 0.26             |
| J statistic                                   | 26.762            | 23.349           | 16.108            | 12.045           | 17.173           |
| p-value J statistic (over-identification)     | 0.021             | 0.055            | 0.307             | 0.603            | 0.247            |
| F statistic (sm. rate 20% most pop.)          | 35.284            | 35.284           | 35.033            | 32.804           | 32.794           |
| p-value F statistic (sm. rate 20% most pop.)  | 0                 | 0                | 0                 | 0                | 0                |
| F statistic (sm. rate 80% least pop.)         | 105.28            | 105.28           | 104.445           | 89.464           | 89.433           |
| p-value F statistic (sm. rate 80% least pop.) | 0                 | 0                | 0                 | 0                | 0                |
| N                                             | 7769              | 7232             | 7736              | 6387             | 6433             |

Instrumental variables: percentage of black students, students with older siblings, parents who smoke, households with smokers, parents home after school finishes, average household income and average weekly earnings. IVs are computed both among the 20% most popular and the 80% least popular students. These variables are only available in the InHome survey, hence, we compute them from the InHome sample to instrument the mean popularity in the InSchool sample (see Fig 1). Regressions include school fixed effects. Robust standard errors are in parenthesis. Peer smokers are those who smoke at least “once or twice a week” in 1995. Peer variables are at the grade level. Includes all covariates from S2 Table. \*Significance at the 10% level; \*\*Significance at the 5% level; \*\*\*Significance at the 1% level.
