# Supplementary material for: Peer effects on adolescent smoking: Are popular teens more influential?
Source: PLOS journal article supplement (doi:10.1371/journal.pone.0189360), 2018-07-12
Supplement: S9 (10.1371/journal.pone.0189360.s009) [file journal.pone.0189360.s009]

**S9 Table. Probability of smoking and smoking propensity by popularity quintiles of peers – probit average marginal effects.**

|                            | Tried 1996          | 1996              | 2002                | 2009              | by 2009              |
|----------------------------|---------------------|-------------------|---------------------|-------------------|----------------------|
| <i>Smoking propensity:</i> |                     |                   |                     |                   |                      |
| Top pop. quintile          | 0.161***<br>(0.057) | 0.051<br>(0.040)  | 0.179***<br>(0.039) | 0.02<br>(0.064)   | 0.144**<br>(0.067)   |
| 2nd pop. quintile          | 0.072<br>(0.058)    | 0.038<br>(0.038)  | -0.092<br>(0.058)   | -0.024<br>(0.051) | -0.077<br>(0.071)    |
| 3rd pop. quintile          | 0.078<br>(0.051)    | 0.064<br>(0.051)  | -0.024<br>(0.057)   | 0.102*<br>(0.057) | 0.067<br>(0.070)     |
| 4th pop. quintile          | -0.094*<br>(0.050)  | -0.006<br>(0.034) | -0.026<br>(0.050)   | -0.062<br>(0.055) | -0.242***<br>(0.052) |
| 5th pop. quintile          | -0.018<br>(0.053)   | 0.008<br>(0.030)  | -0.074*<br>(0.045)  | -0.033<br>(0.058) | -0.053<br>(0.069)    |

Regressions include school fixed effects. Standard errors clustered at the school level are shown in parenthesis. Peer smokers are those who smoke at least “once or twice a week” in 1995. Peer variables are at the grade level. Includes all covariates from S2 Table. \*Significance at the 10% level; \*\*Significance at the 5% level; \*\*\*Significance at the 1% level.
